# Supplementary material for: Cyclodextrin complexes of the anticonvulsant agent valproic acid
Source: Royal Society of Chemistry journal article supplement (doi:10.1039/d1ce01024g), 2021-01-01
Supplement: d1ce01024g1.pdf [file d1ce01024g1.pdf]

## **ELECTRONIC SUPPLEMENTARY INFORMATION (ESI) for the paper:**

Cyclodextrin complexes of the anticonvulsant agent valproic acid.

A.I. Vicatos and M. R. Caira

### **CONTENTS**

**Fig. S1** The  $^1\text{H}$  NMR spectrum of  $\alpha\text{-CD}\cdot\text{VAL}$ .

**Table S1** The  $^1\text{H}$  NMR spectral analysis of  $\alpha\text{-CD}\cdot\text{VAL}$ .

**Fig. S2** The  $^1\text{H}$  NMR spectrum of  $\beta\text{-CD}\cdot\text{VAL}$ .

**Table S2** The  $^1\text{H}$  NMR spectral analysis of  $\beta\text{-CD}\cdot\text{VAL}$ .

**Fig. S3** The  $^1\text{H}$  NMR spectrum of  $\gamma\text{-CD}\cdot\text{VAL}$ .

**Table S3** The  $^1\text{H}$  NMR spectral analysis of  $\gamma\text{-CD}\cdot\text{VAL}$ .

**Fig. S4** The  $^1\text{H}$  NMR spectrum of  $\text{DMB}\cdot\text{VAL}$ .

**Table S4** The  $^1\text{H}$  NMR spectral analysis of  $\text{DMB}\cdot\text{VAL}$ .

**Fig. S5** The  $^1\text{H}$  NMR spectrum of  $\text{TMB}\cdot\text{VAL}$ .

**Table S5** The  $^1\text{H}$  NMR spectral analysis of  $\text{TMB}\cdot\text{VAL}$ .

**Fig. S6** The  $^1\text{H}$  NMR spectrum of  $\text{TMA}\cdot\text{VAL}$ .

**Table S6** The  $^1\text{H}$  NMR spectral analysis of  $\text{TMA}\cdot\text{VAL}$ .

**Fig. S7** Representative TGA curve for  $\alpha\text{-CD}\cdot\text{VAL}$  ( $n = 2$ ) [blue] and a representative DSC trace for  $\alpha\text{-CD}\cdot\text{VAL}$  ( $n = 2$ ) [red].

**Fig. S8** Representative TGA curve for  $\beta\text{-CD}\cdot\text{VAL}$  ( $n = 2$ ) [blue] and a DSC curve for  $\beta\text{-CD}\cdot\text{VAL}$  ( $n = 2$ ) [red].

**Fig. S9** Representative TGA curve for  $\gamma\text{-CD}\cdot\text{VAL}$  ( $n = 2$ ) [blue] and a DSC curve for  $\gamma\text{-CD}\cdot\text{VAL}$  ( $n = 2$ ) [red].

**Fig. S10** Representative TGA curve for  $\text{DMB}\cdot\text{VAL}$  ( $n = 2$ ) [blue] and a DSC curve for  $\text{DMB}\cdot\text{VAL}$  ( $n = 2$ ) [red].

**Fig. S11** Representative TGA curve for  $\text{TMB}\cdot\text{VAL}$  ( $n = 2$ ) [blue] and a representative DSC curve for  $\text{TMB}\cdot\text{VAL}$  ( $n = 3$ ) [red].

**Fig. S12** Representative TGA curve for  $\text{TMA}\cdot\text{VAL}$  ( $n = 2$ ) [blue] and a representative DSC curve for  $\text{TMA}\cdot\text{VAL}$  ( $n = 2$ ) [red].

**Table S7** TGA and DSC measurements.

**Fig. S13** FT-IR shift of the C=O band on inclusion of VAL in  $\alpha\text{-CD}$ .

**Fig. S14** FT-IR shift of the C=O band on inclusion of VAL in  $\beta\text{-CD}$ .

**Fig. S15** FT-IR shift of the C=O band on inclusion of VAL in  $\gamma$ -CD.

**Fig. S16** FT-IR shift of the C=O band on inclusion of VAL in DMB.

**Fig. S17** FT-IR shift of the C=O band on inclusion of VAL in TMB.

**Fig. S18** FT-IR shift of the C=O band on inclusion of VAL in TMA.

**Fig. S19** PXRD patterns  $\alpha$ -CD·VAL produced via co-precipitation (2:1) and kneading (2:1).

**Fig. S20** PXRD patterns  $\beta$ -CD·VAL produced via co-precipitation (1:1) and kneading (1:1) and that of an isostructural  $\beta$ -CD inclusion complex crystallizing in the space group C2.

**Fig. S21** The PXRD patterns of an isostructural  $\gamma$ -CD inclusion complex crystallizing in the space group P4<sub>2</sub>2<sub>1</sub>, and the  $\gamma$ -CD·VAL inclusion complex produced via co-precipitation (3:4) and kneading (3:4).

**Fig. S22** PXRD patterns of the crystal form of DMB employed in this study (polymorph 1, CSD refcode QIYKEO), DMB·VAL produced via co-precipitation (1:1), and a product from kneading DMB and valproic acid.

**Fig. S23** The PXRD patterns of a TMB complex crystallizing in the space group P2<sub>1</sub>2<sub>1</sub>2<sub>1</sub> (refcode XAQJII), a TMB·VAL complex (1:1) produced *via* co-precipitation, a representative isostructural TMB inclusion complex that crystallizes in P2<sub>1</sub>2<sub>1</sub>2<sub>1</sub> (refcode PAFSOE, with different unit cell data from XAQJII) and a different TMB·VAL complex produced *via* kneading.

**Fig. S24** The PXRD patterns of the TMA·VAL inclusion complex produced *via* co-precipitation (1:1) and kneading (1:1).

**Table S8** Crystal Data and Refinement Parameters.

**Fig. S25** Key to atomic and glucose residue numbering for DMB(A).

**Table S9** Geometrical parameters for the host molecule A in DMB·VAL.

**Fig. S26** Key to atomic and glucose residue numbering for DMB(B).

**Table S9** Geometrical parameters for the host molecule A in DMB·VAL.

**Table S10** Geometrical parameters for the host molecule B in DMB·VAL.

**Table S11** Geometrical parameters of the host molecule in TMA·VAL.

**Calculations:** Gravimetric solubility analysis

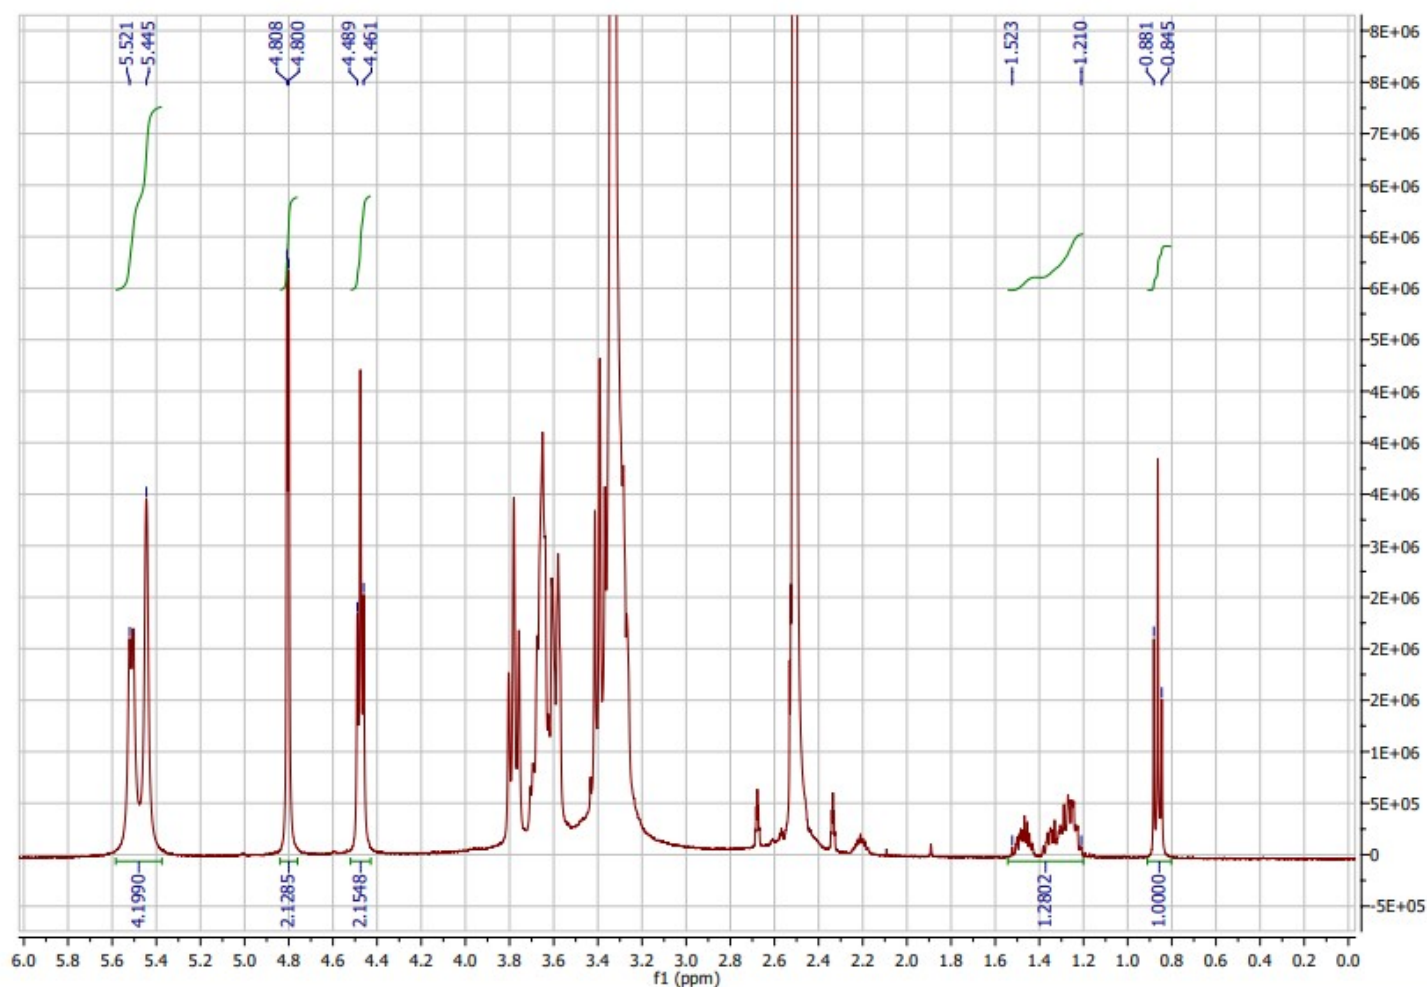

**Fig. S1** The  $^1\text{H}$  NMR spectrum of  $\alpha\text{-CD}\cdot\text{VAL}$ .

**Table S1** The  $^1\text{H}$  NMR spectral analysis of  $\alpha\text{-CD}\cdot\text{VAL}$ .

| Assignment                                             | $\delta$ (ppm) | Integration | Multiplicity                       | Proton representation (per molecule) | Stoichiometric ratio | Stoichiometric ratio (integer) |
|--------------------------------------------------------|----------------|-------------|------------------------------------|--------------------------------------|----------------------|--------------------------------|
| 2 x $\text{CH}_3$ (valproic acid)                      | 0.845-0.881    | 1.0000*     | Triplet                            | 6H                                   | 1.0000               | 1                              |
| 4 x $\text{CH}_2$ (valproic acid)                      | 1.210-1.523    | 1.2802      | Multiplet                          | 8H                                   | 0.9602               | 1                              |
| $\text{OH-6}$ ( $\alpha\text{-CD}$ )                   | 4.461-4.489    | 2.1548      | Triplet                            | 6H                                   | 2.1548               | 2                              |
| $\text{CH-1}$ ( $\alpha\text{-CD}$ )                   | 4.800-4.808    | 2.1285      | Doublet                            | 6H                                   | 2.1285               | 2                              |
| $\text{OH-2}$ and $\text{OH-3}$ ( $\alpha\text{-CD}$ ) | 5.445-5.521    | 4.1990      | Two separate doublets <sup>1</sup> | 12H                                  | 2.0995               | 2                              |

\*reference integral

<sup>1</sup> The  $^1\text{H}$  NMR spectrum displays one doublet and a singlet. This singlet peak would resolve into the second doublet at a higher resolution, or if more mass was available during the experiment.

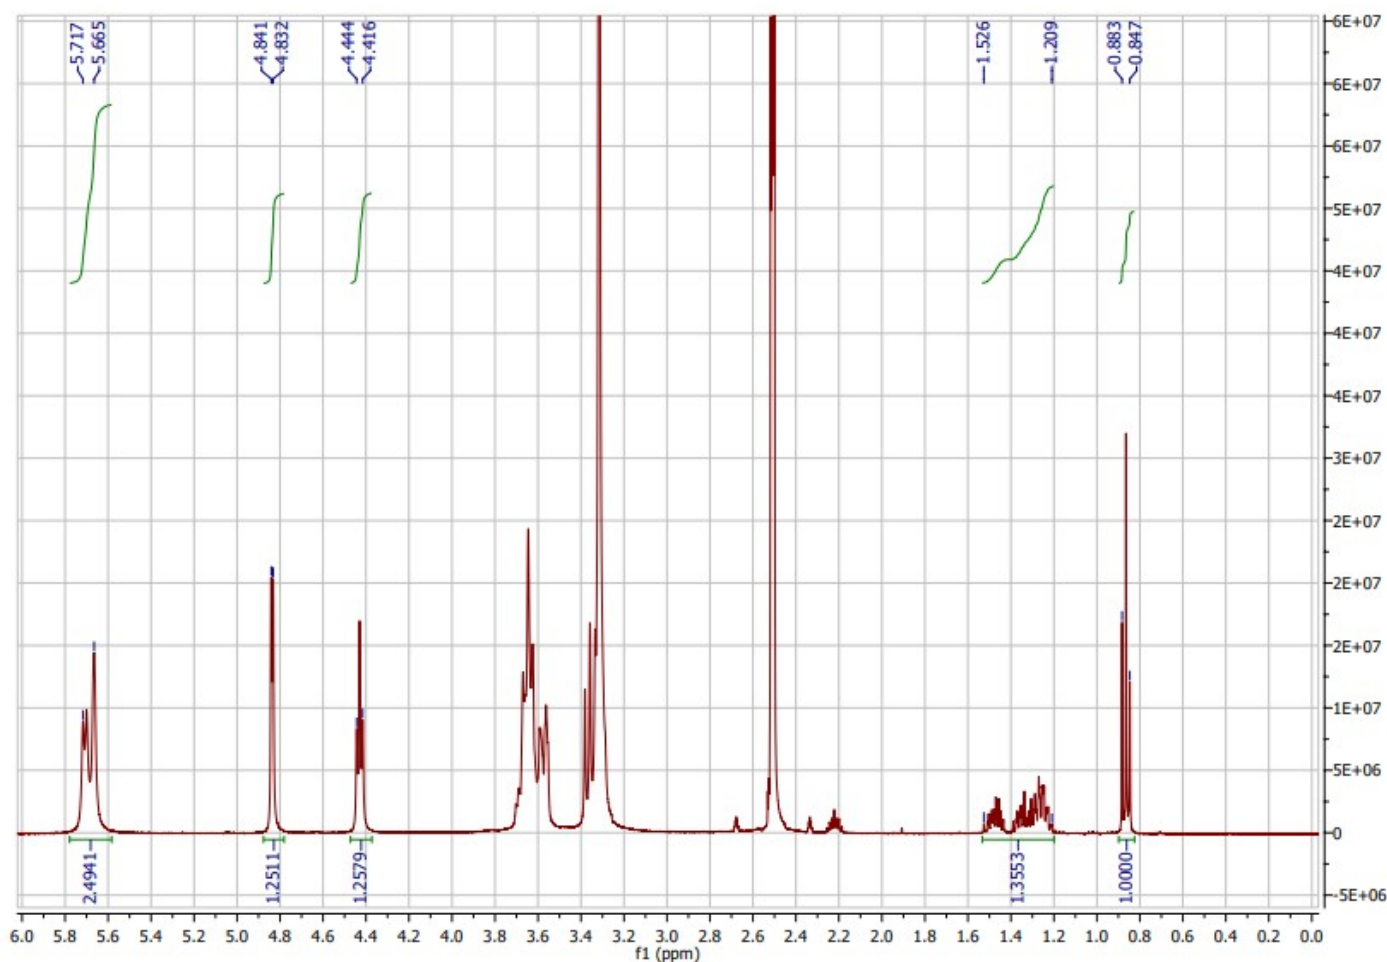

Fig. S2 The  $^1\text{H}$  NMR spectrum of  $\beta\text{-CD}\cdot\text{VAL}$ .

Table S2 The  $^1\text{H}$  NMR spectral analysis of  $\beta\text{-CD}\cdot\text{VAL}$ .

| Assignment                                            | $\delta$ (ppm) | Integration | Multiplicity                       | Proton representation (per molecule) | Stoichiometric ratio | Stoichiometric ratio (integer) |
|-------------------------------------------------------|----------------|-------------|------------------------------------|--------------------------------------|----------------------|--------------------------------|
| 2 x $\text{CH}_3$ (valproic acid)                     | 0.847-0.883    | 1.0000*     | Triplet                            | 6H                                   | 1.0000               | 1                              |
| 4 x $\text{CH}_2$ (valproic acid)                     | 1.209-1.526    | 1.3553      | Multiplet                          | 8H                                   | 1.0165               | 1                              |
| $\text{OH-6}$ ( $\beta\text{-CD}$ )                   | 4.416-4.444    | 1.2579      | Triplet                            | 7H                                   | 1.1007               | 1                              |
| $\text{CH-1}$ ( $\beta\text{-CD}$ )                   | 4.832-4.841    | 1.2511      | Doublet                            | 7H                                   | 1.0947               | 1                              |
| $\text{OH-2}$ and $\text{OH-3}$ ( $\beta\text{-CD}$ ) | 5.665-5.717    | 2.4941      | Two separate doublets <sup>2</sup> | 14H                                  | 1.2471               | 1                              |

\*reference integral

<sup>2</sup> The  $^1\text{H}$  NMR spectrum displays one doublet and a singlet. This singlet peak would resolve into the second doublet at a higher resolution, or if more mass was available during the experiment.

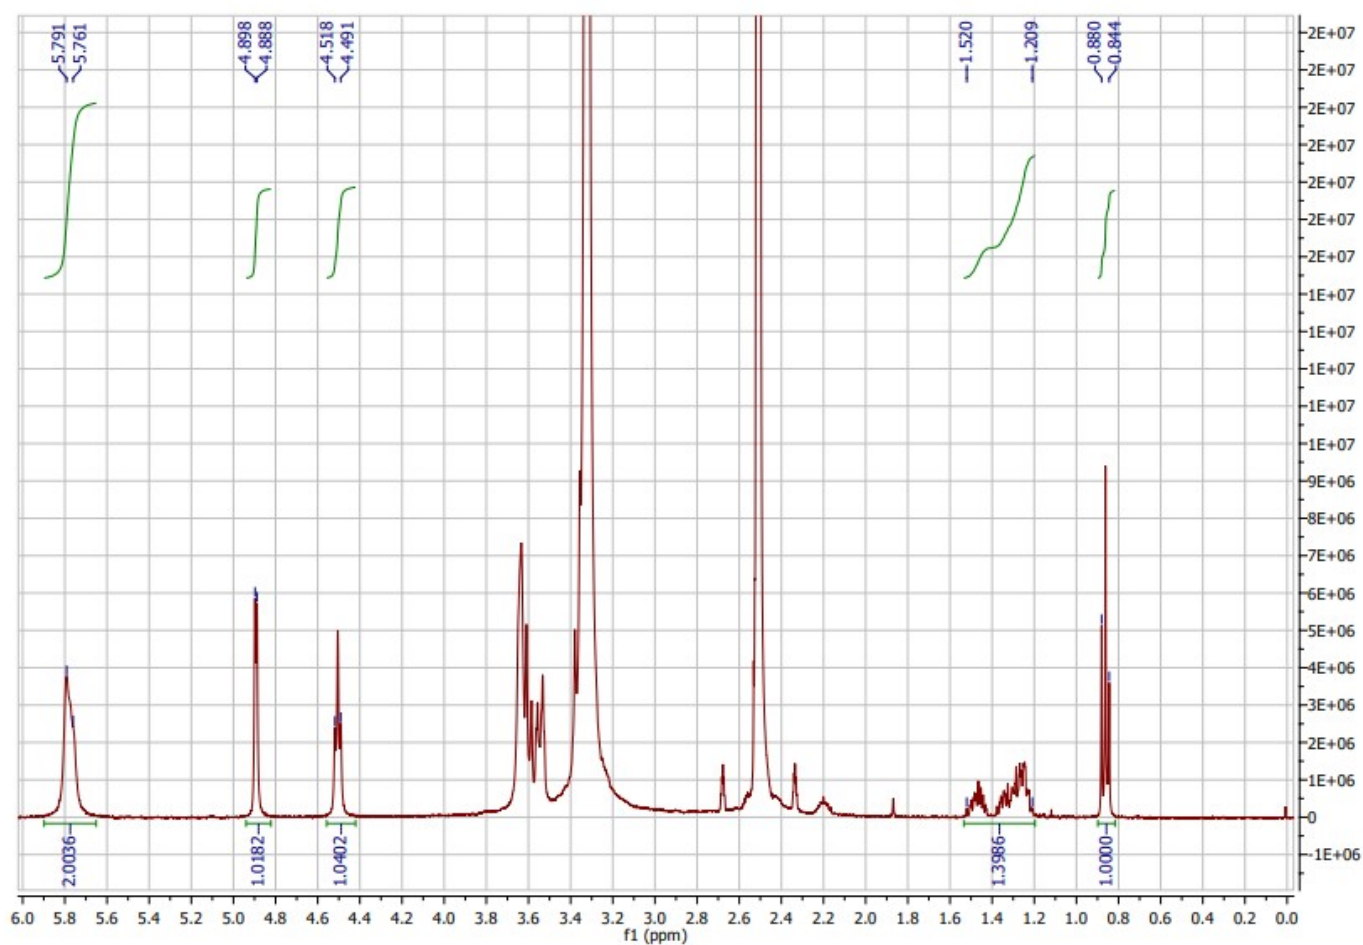

**Fig. S3** The  $^1\text{H}$  NMR spectrum of  $\gamma\text{-CD}\cdot\text{VAL}$ .

**Table S3** The  $^1\text{H}$  NMR spectral analysis of  $\gamma\text{-CD}\cdot\text{VAL}$ .

| Assignment                                                | $\delta$ (ppm)  | Integration | Multiplicity                             | Proton representation (per molecule) | Stoichiometric ratio | Stoichiometric ratio (integer) |
|-----------------------------------------------------------|-----------------|-------------|------------------------------------------|--------------------------------------|----------------------|--------------------------------|
| 2 x $\text{CH}_3$<br>(valproic acid)                      | 0.844-<br>0.880 | 1.0000*     | Triplet                                  | 6H                                   | 1.0000               | 4                              |
| 4 x $\text{CH}_2$<br>(valproic acid)                      | 1.209-<br>1.520 | 1.3986      | Multiplet                                | 8H                                   | 1.0490               | 4                              |
| $\text{OH-6}$ ( $\gamma\text{-CD}$ )                      | 4.491-<br>4.518 | 1.0402      | Triplet                                  | 8H                                   | 0.7802               | 3                              |
| $\text{CH-1}$ ( $\gamma\text{-CD}$ )                      | 4.888-<br>4.898 | 1.0182      | Doublet                                  | 8H                                   | 0.7637               | 3                              |
| $\text{OH-2}$ and $\text{OH-3}$<br>( $\gamma\text{-CD}$ ) | 5.761-<br>5.791 | 2.0036      | Two<br>separate<br>doublets <sup>3</sup> | 16H                                  | 0.7514               | 3                              |

\*reference integral

<sup>3</sup> The  $^1\text{H}$  NMR spectrum does not display adequate peak definition over this range; however, it is expected that these peaks would resolve into two separate doublets at a higher resolution, or if more mass was available during the experiment.

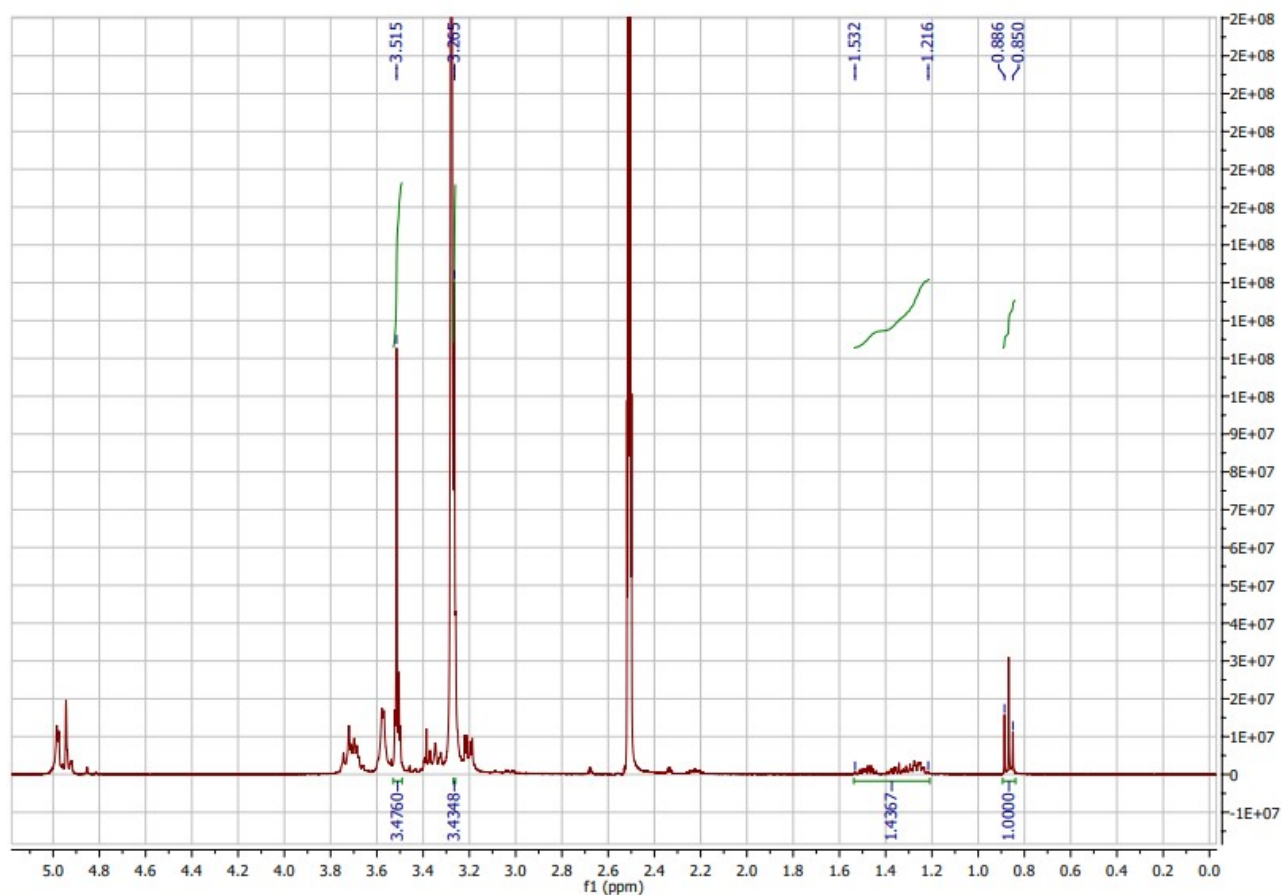

Fig. S4 The <sup>1</sup>H NMR spectrum of DMB-VAL.

Table S4 The <sup>1</sup>H NMR spectral analysis of DMB-VAL.

| Assignment                          | $\delta$ (ppm) | Integration | Multiplicity | Proton representation (per molecule) | Stoichiometric ratio | Stoichiometric ratio (integer) |
|-------------------------------------|----------------|-------------|--------------|--------------------------------------|----------------------|--------------------------------|
| 2 x CH <sub>3</sub> (valproic acid) | 0.850-0.886    | 1.0000*     | Triplet      | 6H                                   | 1.0000               | 1                              |
| 4 x CH <sub>2</sub> (valproic acid) | 1.216-1.532    | 1.4367      | Multiplet    | 8H                                   | 1.0775               | 1                              |
| OCH <sub>3</sub> -6 (DMB)           | 3.265          | 3.4348      | Singlet      | 21H                                  | 0.9814               | 1                              |
| OCH <sub>3</sub> -2 (DMB)           | 3.515          | 3.4760      | Singlet      | 21H                                  | 0.9931               | 1                              |

\*reference integral

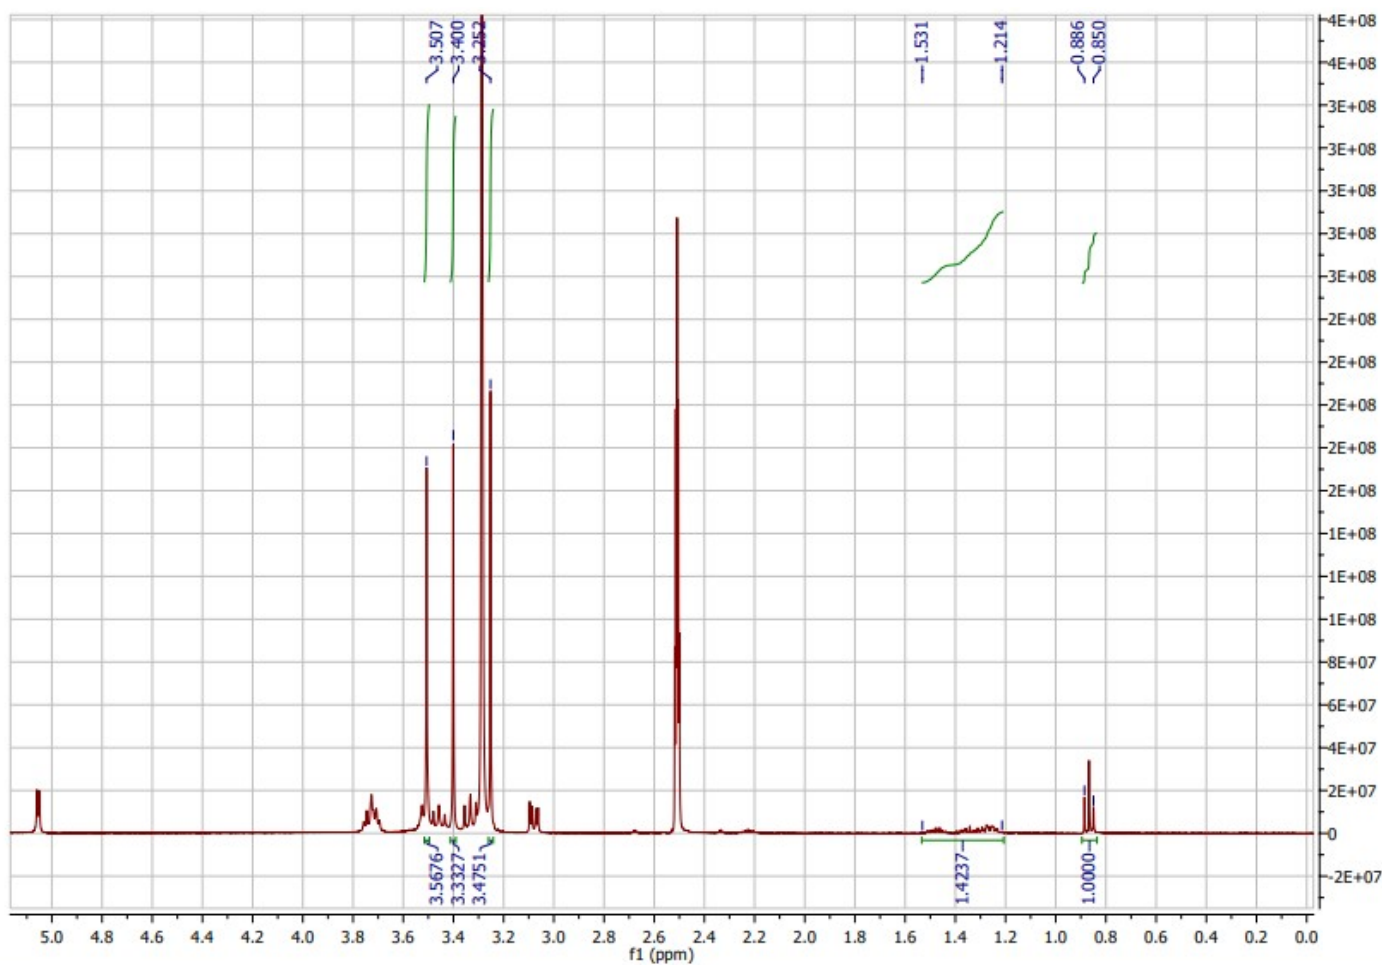

**Fig. S5** The <sup>1</sup>H NMR spectrum of TMB·VAL.

**Table S5** The <sup>1</sup>H NMR spectral analysis of TMB·VAL.

| Assignment                          | $\delta$ (ppm) | Integration | Multiplicity | Proton representation (per molecule) | Stoichiometric ratio | Stoichiometric ratio (integer) |
|-------------------------------------|----------------|-------------|--------------|--------------------------------------|----------------------|--------------------------------|
| 2 x CH <sub>3</sub> (valproic acid) | 0.850-0.886    | 1.0000*     | Triplet      | 6H                                   | 1.0000               | 1                              |
| 4 x CH <sub>2</sub> (valproic acid) | 1.214-1.531    | 1.4237      | Multiplet    | 8H                                   | 1.0678               | 1                              |
| OCH <sub>3</sub> -6 (TMB)           | 3.252          | 3.4751      | Singlet      | 21                                   | 0.9929               | 1                              |
| OCH <sub>3</sub> -3 (TMB)           | 3.400          | 3.3327      | Singlet      | 21                                   | 0.9522               | 1                              |
| OCH <sub>3</sub> -2 (TMB)           | 3.507          | 3.5676      | Singlet      | 21                                   | 1.0193               | 1                              |

\*reference integral

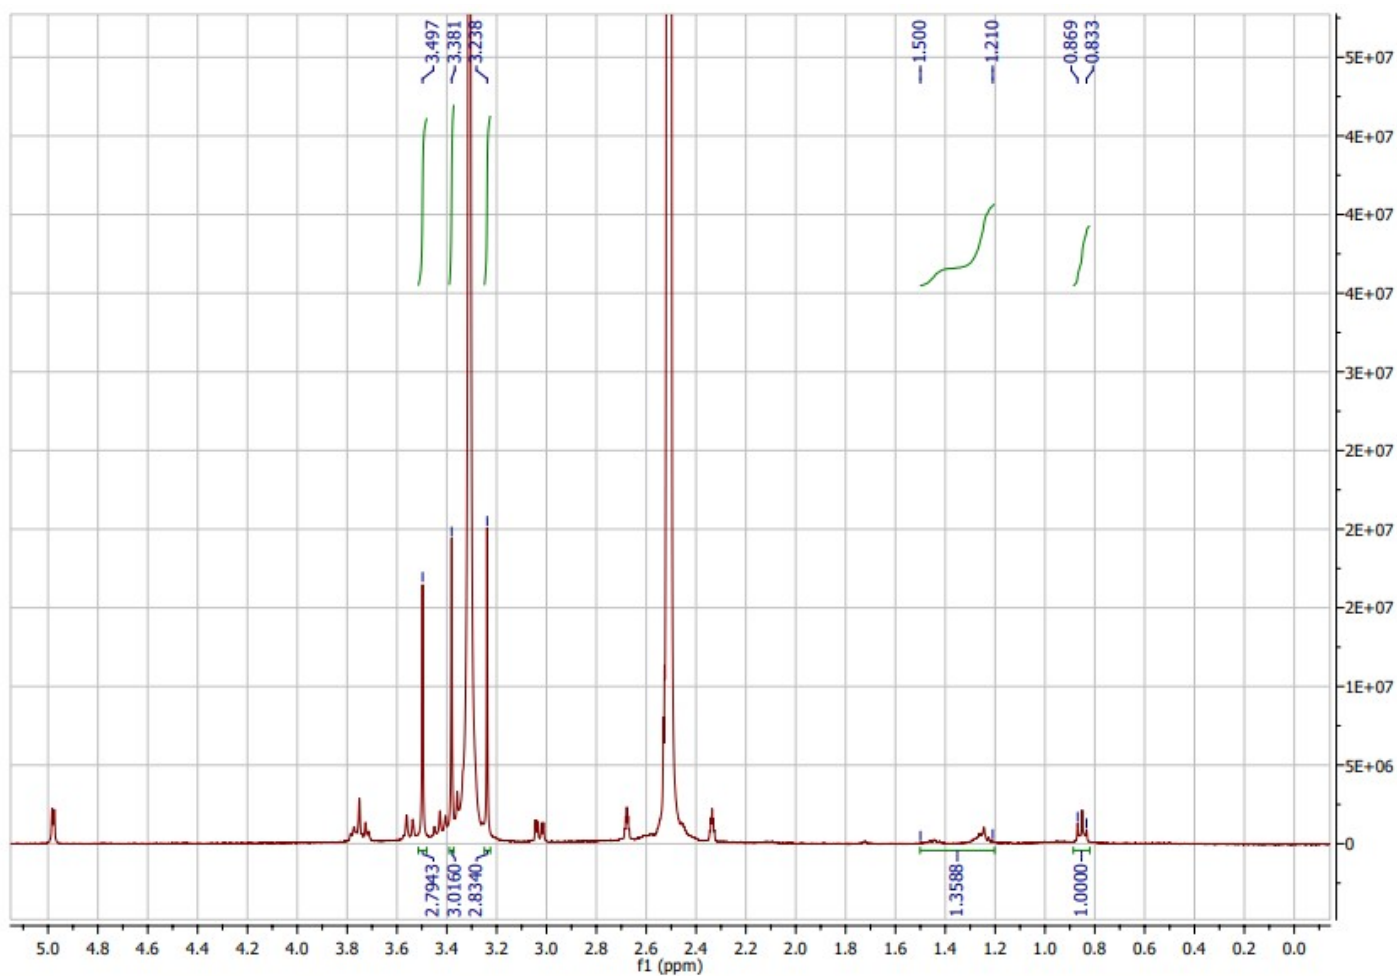

**Fig. S6** The <sup>1</sup>H NMR spectrum of TMA·VAL.

**Table S6** The <sup>1</sup>H NMR spectral analysis of TMA·VAL.

| Assignment                             | $\delta$ (ppm)  | Integration | Multiplicity | Proton representation (per molecule) | Stoichiometric ratio | Stoichiometric ratio (integer) |
|----------------------------------------|-----------------|-------------|--------------|--------------------------------------|----------------------|--------------------------------|
| 2 x CH <sub>3</sub><br>(valproic acid) | 0.833-<br>0.869 | 1.0000*     | Triplet      | 6H                                   | 1.0000               | 1                              |
| 4 x CH <sub>2</sub><br>(valproic acid) | 1.210-<br>1.500 | 1.3588      | Multiplet    | 8H                                   | 1.0191               | 1                              |
| OCH <sub>3</sub> -6 (TMA)              | 3.238           | 2.8340      | Singlet      | 18H                                  | 0.9447               | 1                              |
| OCH <sub>3</sub> -3 (TMA)              | 3.381           | 3.0160      | Singlet      | 18H                                  | 1.0053               | 1                              |
| OCH <sub>3</sub> -2 (TMA)              | 3.497           | 2.7943      | Singlet      | 18H                                  | 0.9314               | 1                              |

\*reference integral



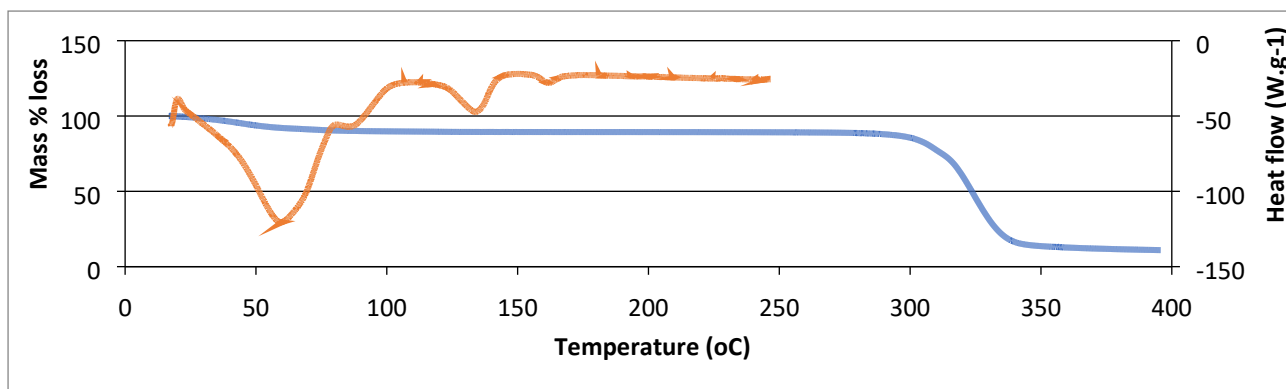

**Fig. S7** Representative TGA curve for  $\alpha$ -CD-VAL (n = 2) [blue] and a representative DSC trace for  $\alpha$ -CD-VAL (n = 2) [red].

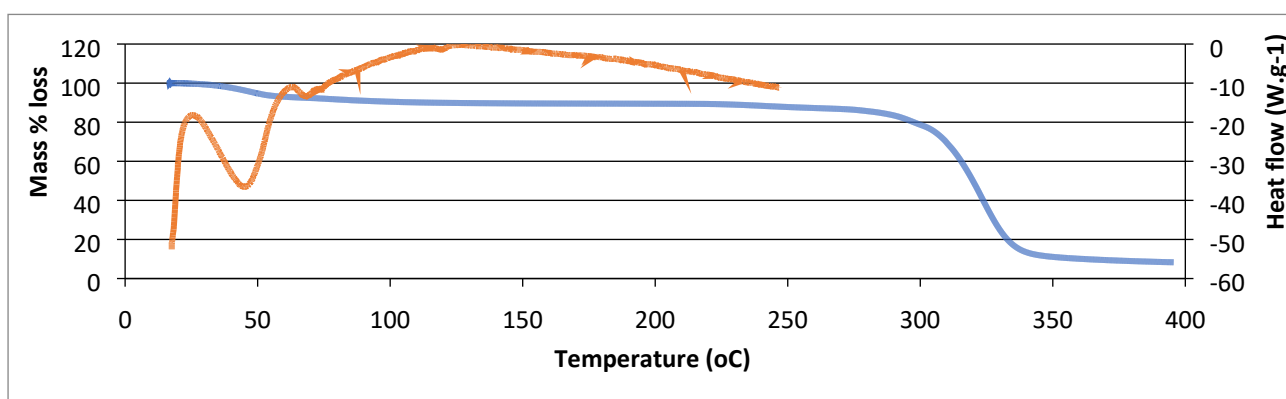

**Fig. S8** Representative TGA curve for  $\beta$ -CD-VAL (n = 2) [blue] and a DSC curve for  $\beta$ -CD-VAL (n = 2) [red].

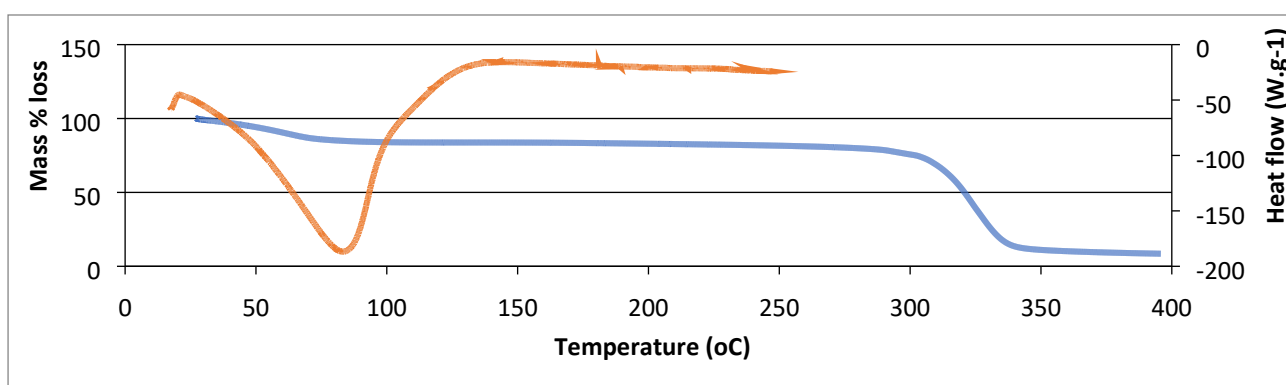

**Fig. S9** Representative TGA curve for  $\gamma$ -CD-VAL (n = 2) [blue] and a DSC curve for  $\gamma$ -CD-VAL (n = 2) [red].

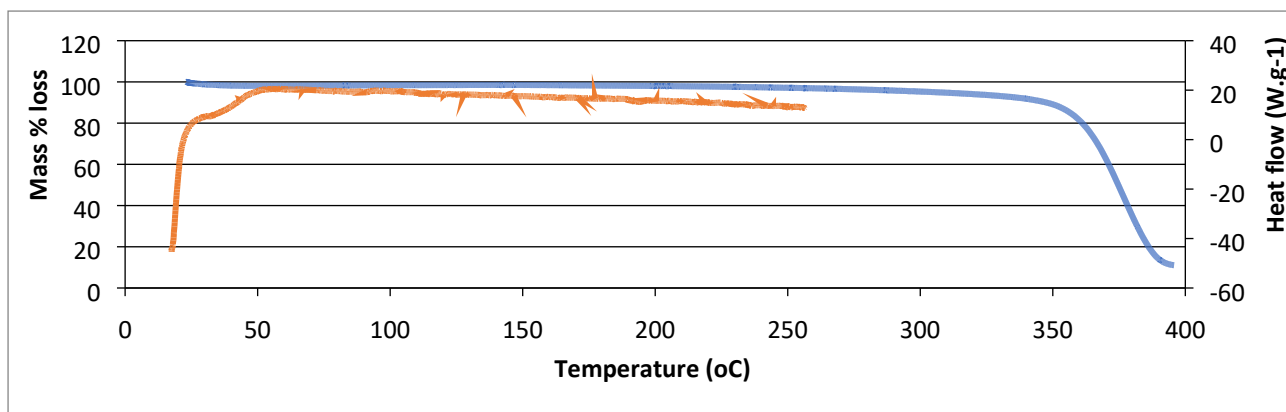

**Fig. S10** Representative TGA curve for DMB·VAL (n = 2) [blue] and a DSC curve for DMB·CD·VAL (n = 2) [red].

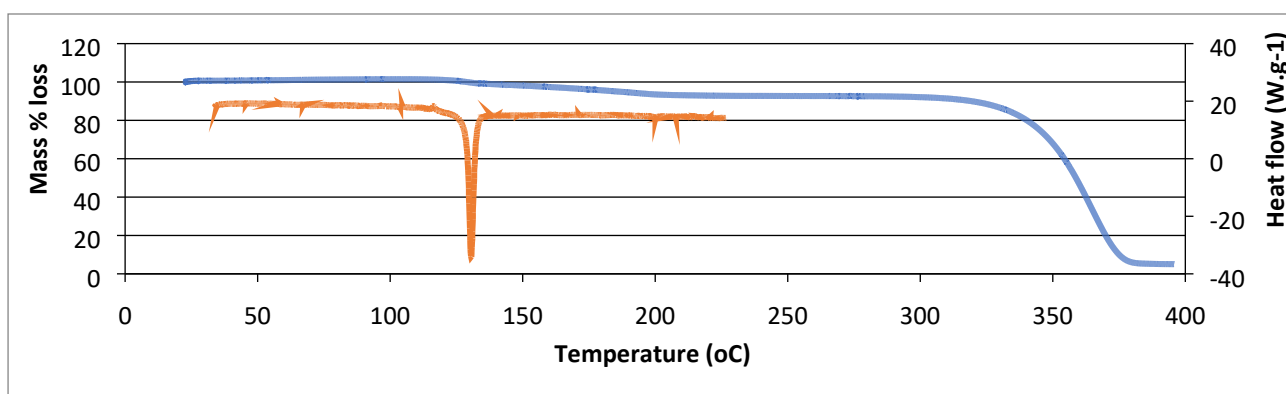

**Fig. S11** Representative TGA curve for TMB·VAL (n = 2) [blue] and a representative DSC curve for TMB·CD·VAL (n = 3) [red].

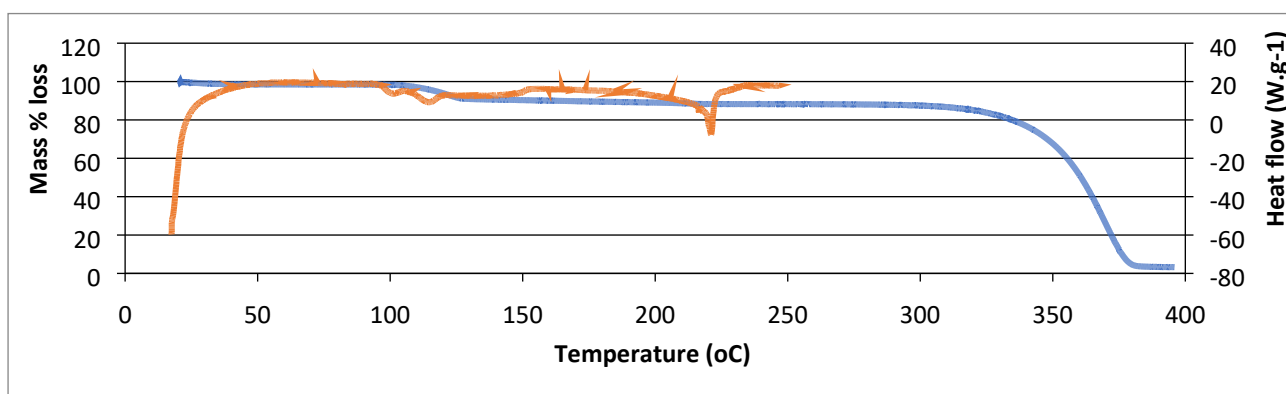

**Fig. S12** Representative TGA curve for TMA·VAL (n = 2) [blue] and a representative DSC curve for TMA·CD·VAL (n = 2) [red].

**Table S7** TGA and DSC measurements.

| Complex          | DSC                                                                                                                                                                                                                                                                                                                                                                                                                                                            | TGA                                                                                                                                                                                                                                                                                       |
|------------------|----------------------------------------------------------------------------------------------------------------------------------------------------------------------------------------------------------------------------------------------------------------------------------------------------------------------------------------------------------------------------------------------------------------------------------------------------------------|-------------------------------------------------------------------------------------------------------------------------------------------------------------------------------------------------------------------------------------------------------------------------------------------|
| $\alpha$ -CD·VAL | 1) Onset temp (1): 21.0<br>2) Peak temp. (1): $61.6 \pm 1.8$<br>3) Onset of shoulder endotherm: $81.1 \text{ }^\circ\text{C} \pm 0.9$<br>4) Onset temp (2): $120.9 \pm 0.5$<br>5) Peak temp. (2): $133.8 \pm 0.1$<br>6) Onset temp (3): $155.9 \pm 0.3$<br>Peak temp. (3): $161.5 \pm 0.1$                                                                                                                                                                     | <u>Dehydration:</u><br>$10.4 \pm 0.3 \%$ ( $25.0$ and $128.9 \text{ }^\circ\text{C}$ ), which equates to 6.7 water molecules per $\alpha$ -CD molecule.                                                                                                                                   |
| $\beta$ -CD·VAL  | Onset temp. (1): $25.2 \text{ }^\circ\text{C}$<br>Peak temp. (1): $47.9$<br>Onset temp. (2): $65.5 \text{ }^\circ\text{C}$<br>Peak temp. (2): $67.9 \text{ }^\circ\text{C}$<br>Onset temp. (3): $118.0 \text{ }^\circ\text{C}$<br>Peak temp. (3): $120.0 \text{ }^\circ\text{C}$                                                                                                                                                                               | <u>Dehydration:</u><br>$11.5 \pm 1.0 \%$ ( $16.7 \text{ }^\circ\text{C}$ and $128.6 \text{ }^\circ\text{C}$ ), which equates to 9.2 water molecules per $\beta$ -CD molecule.                                                                                                             |
| $\gamma$ -CD·VAL | Onset temp. (1): $21.0 \text{ }^\circ\text{C}$<br>Peak temp. (1): $82.8 \pm 0.1 \text{ }^\circ\text{C}$                                                                                                                                                                                                                                                                                                                                                        | <u>Dehydration:</u><br>$16.4 \pm 0.6 \%$ ( $21.7$ and $112.3 \text{ }^\circ\text{C}$ ), which equates to 15.3 water molecules per $\gamma$ -CD molecule.                                                                                                                                  |
| DMB·VAL          | Single shoulder: $25.5 - 49.0 \text{ }^\circ\text{C}$                                                                                                                                                                                                                                                                                                                                                                                                          | <u>Dehydration:</u><br>$2.1 \pm 0.3 \%$ ( $23.1$ and $41.9 \text{ }^\circ\text{C}$ ), which equates to 1.8 water molecules per DMB molecule.                                                                                                                                              |
| TMB·VAL          | Onset temp. (melt): $126.7 \pm 0.8 \text{ }^\circ\text{C}$<br>Peak temp. (melt): $130.3 \pm 0.1 \text{ }^\circ\text{C}$                                                                                                                                                                                                                                                                                                                                        | <u>Guest loss:</u><br>$8.3 \pm 0.9 \%$ ( $110.5$ and $239.0 \text{ }^\circ\text{C}$ )<br>(No dehydration occurred).                                                                                                                                                                       |
| TMA·VAL          | Onset temp. (1): $95.1 \pm 0.6 \text{ }^\circ\text{C}$<br>Peak temp. (1): $101.5 \pm 0.5 \text{ }^\circ\text{C}$<br>Onset temp. (2): $108.3 \pm 0.7 \text{ }^\circ\text{C}$<br>Peak temp. (2): $114.6 \pm 0.1 \text{ }^\circ\text{C}$<br>Shoulder range: $119.5 \pm 0.1 \text{ }^\circ\text{C}$ to $152.3 \pm 0.1 \text{ }^\circ\text{C}$<br>Onset temp. (3): $214.8 \pm 2.2 \text{ }^\circ\text{C}$<br>Peak temp. (3): $220.0 \pm 0.1 \text{ }^\circ\text{C}$ | <u>Dehydration:</u><br>$1.5 \pm 0.1 \%$ ( $20.8 \text{ }^\circ\text{C}$ and $38.2 \text{ }^\circ\text{C}$ ), which equates to 1.2 water molecules per TMA molecule.<br><br><u>Guest loss:</u><br>$9.9 \pm 0.7 \%$<br>( $99.4 \text{ }^\circ\text{C}$ and $214.8 \text{ }^\circ\text{C}$ ) |

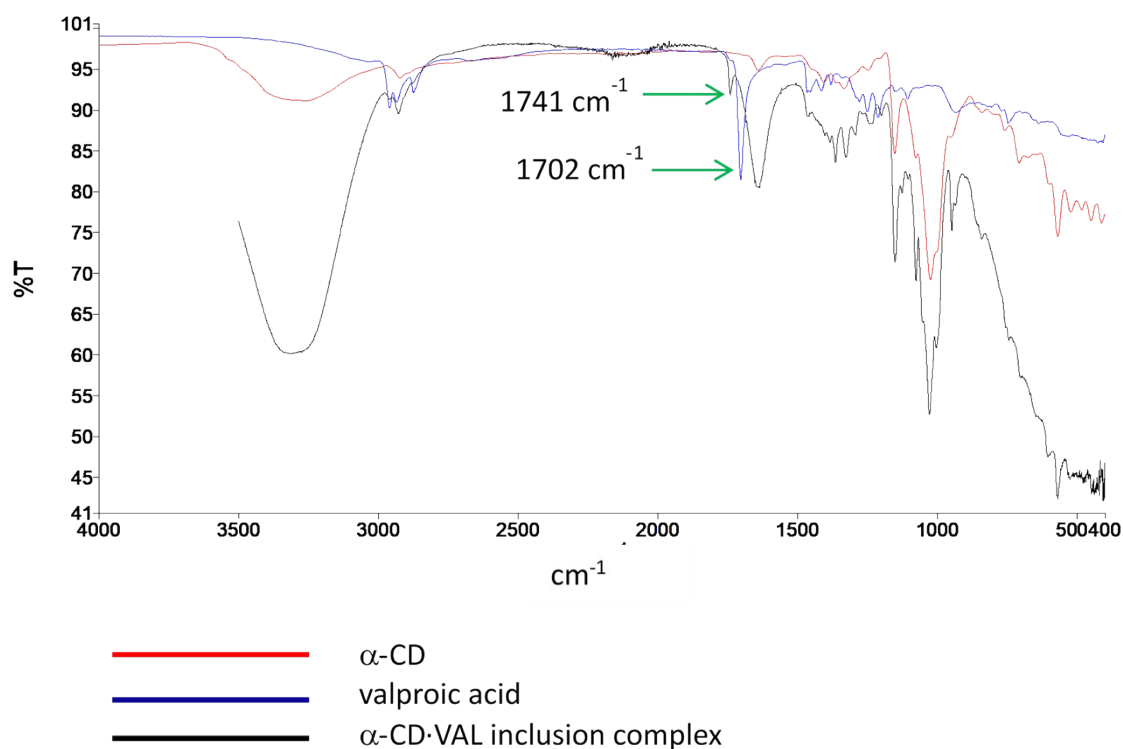

**Fig. S13** FT-IR shift of the C=O band on inclusion of VAL in  $\alpha$ -CD.

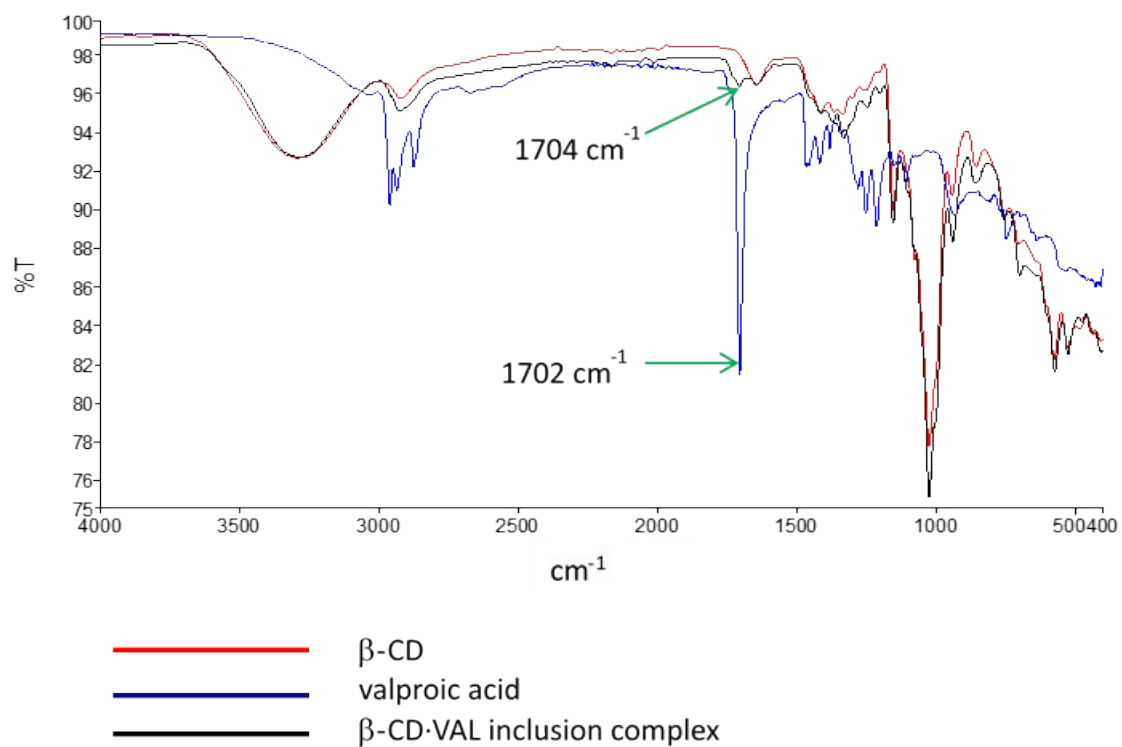

**Fig. S14** FT-IR shift of the C=O band on inclusion of VAL in  $\beta$ -CD.

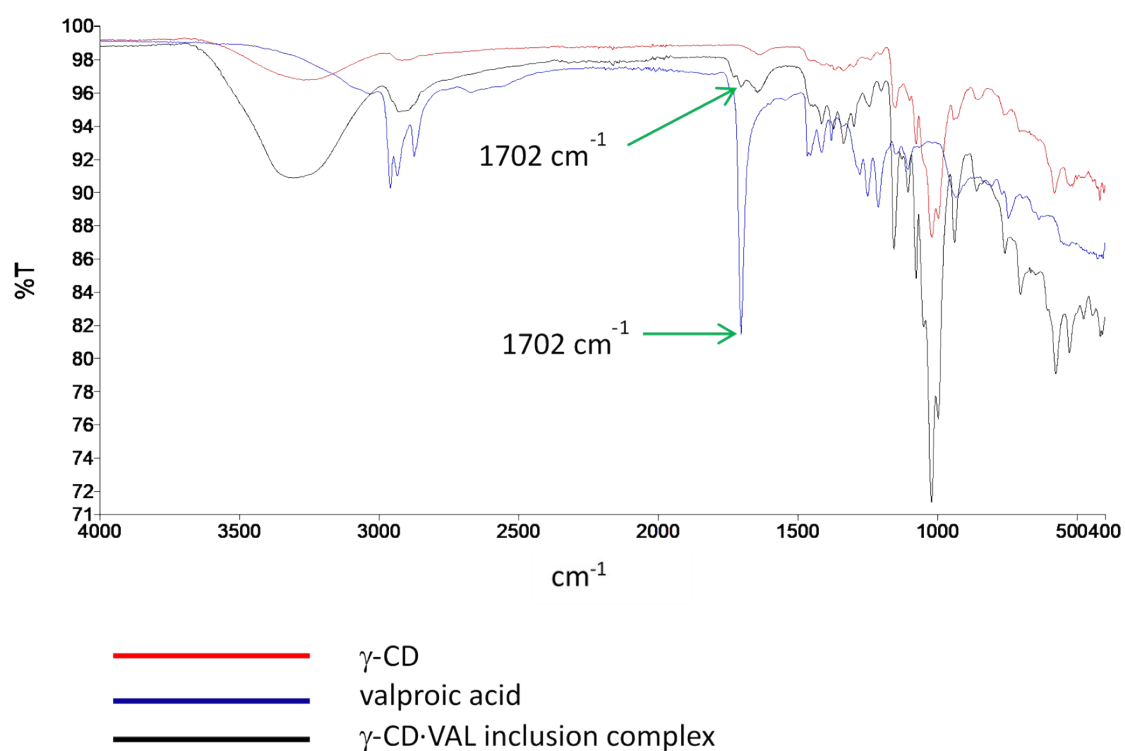

**Fig. S15** FT-IR shift of the C=O band on inclusion of VAL in  $\gamma$ -CD.

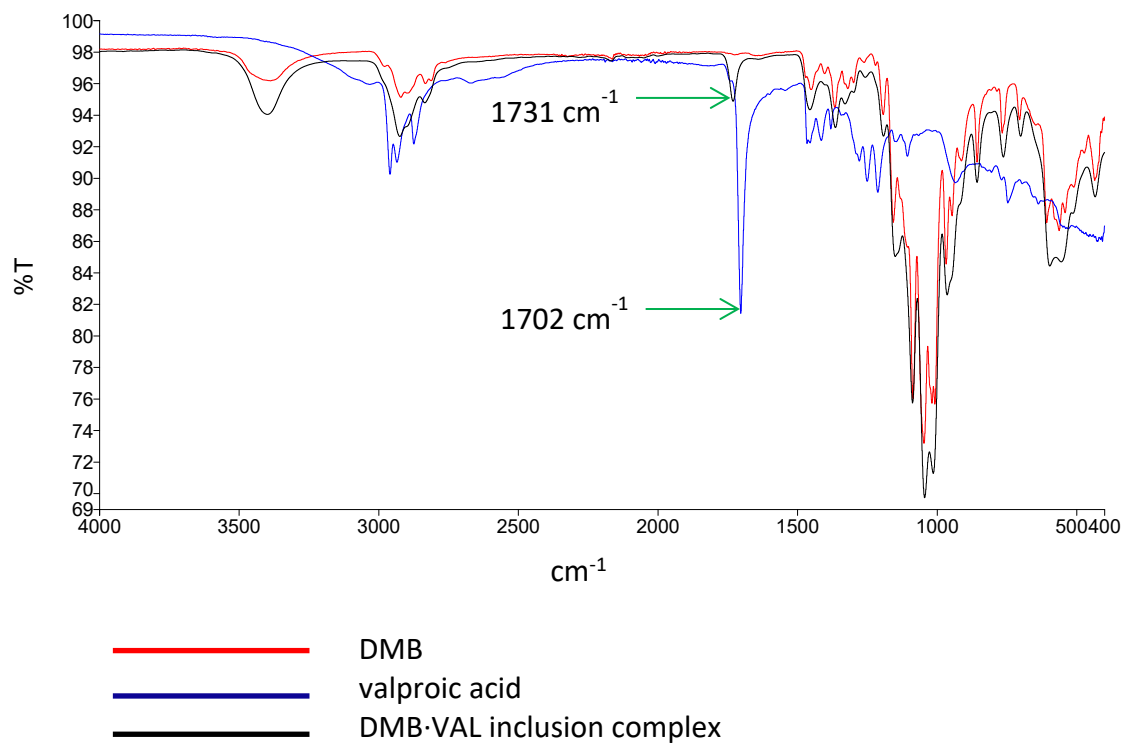

**Fig. S16** FT-IR shift of the C=O band on inclusion of VAL in DMB.

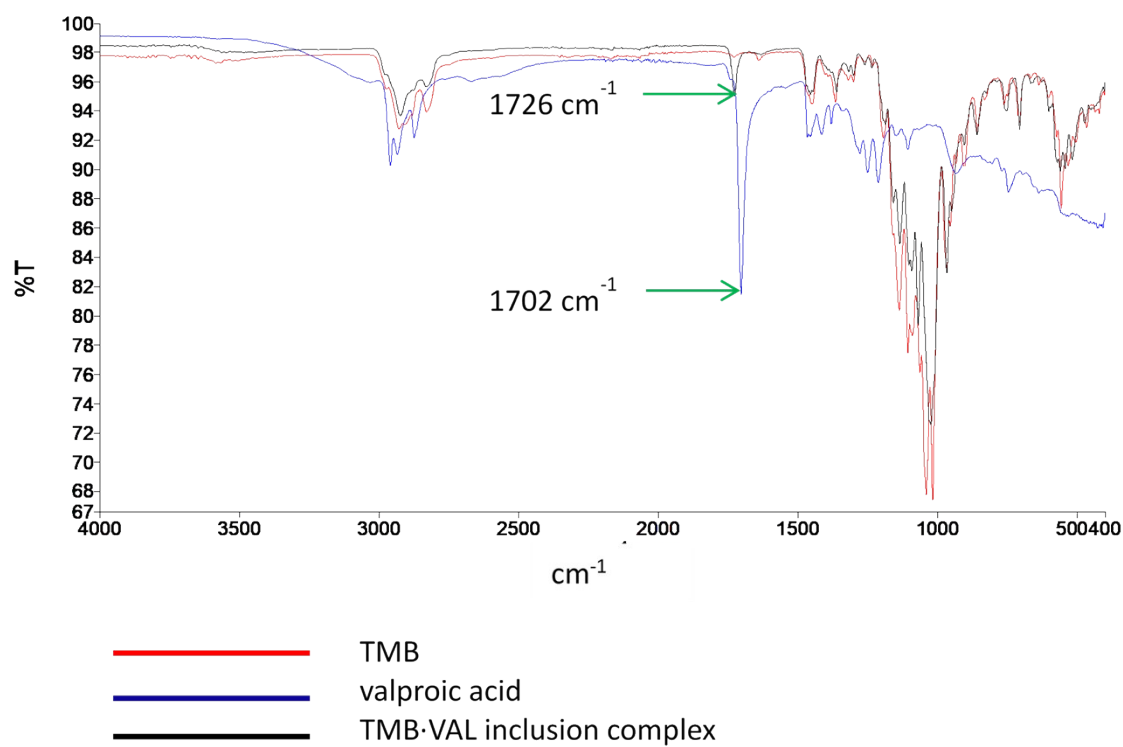

**Fig. S17** FT-IR shift of the C=O band on inclusion of VAL in TMB.

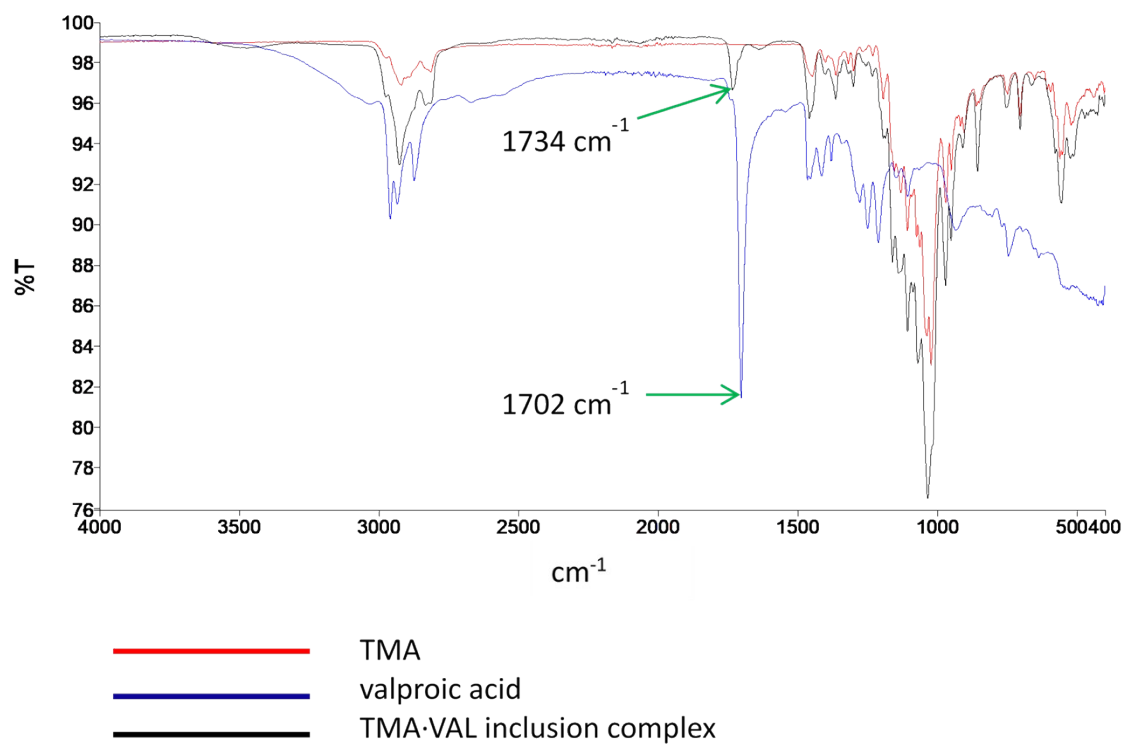

**Fig. S18** FT-IR shift of the C=O band on inclusion of VAL in TMA.

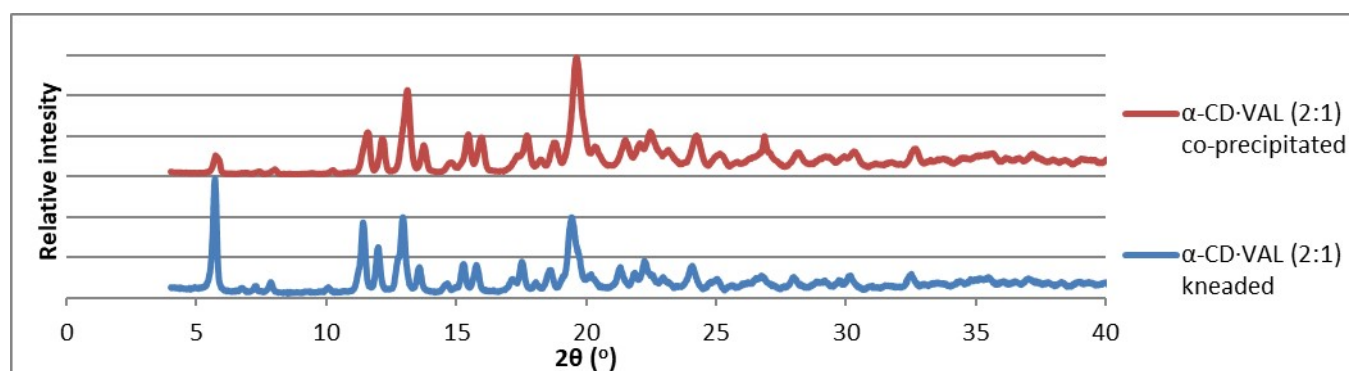

**Fig. S19** PXRD patterns α-CD-VAL produced via co-precipitation (2:1) and kneading (2:1).

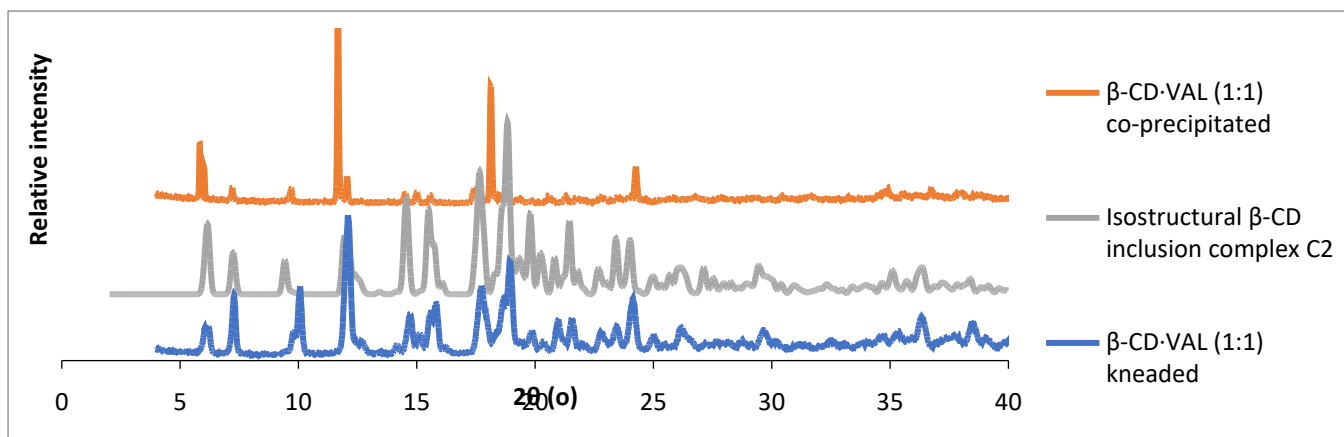

**Fig. S20** PXR D patterns  $\beta$ -CD-VAL produced via co-precipitation (1:1) and kneading (1:1) and that of an isostructural  $\beta$ -CD inclusion complex crystallizing in the space group C2.

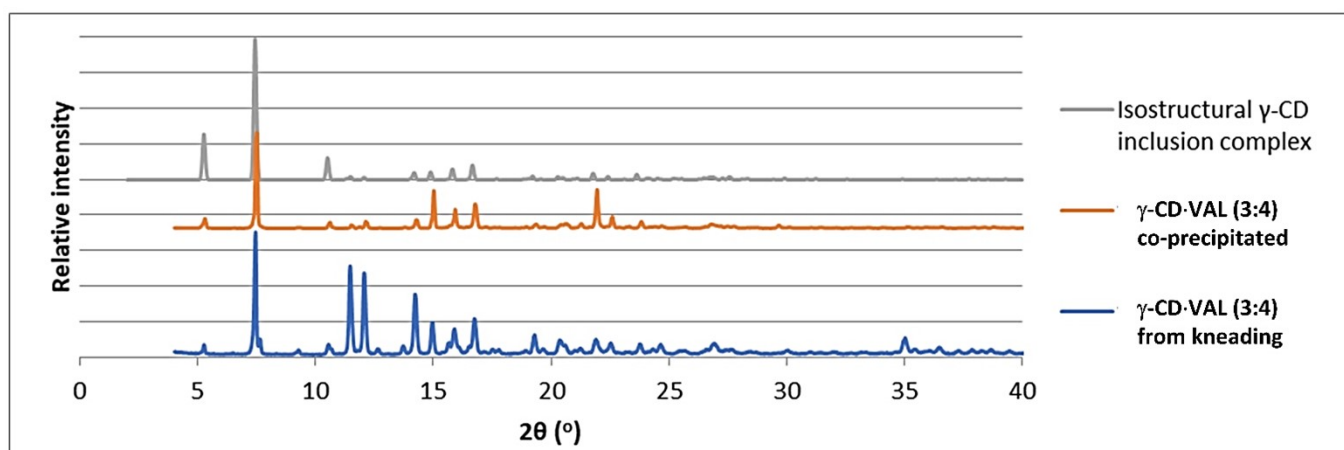

**Fig. S21** The PXR D patterns of an isostructural  $\gamma$ -CD inclusion complex crystallizing in the space group  $P42_12$ , and the  $\gamma$ -CD-VAL inclusion complex produced via co-precipitation (3:4) and kneading (3:4).

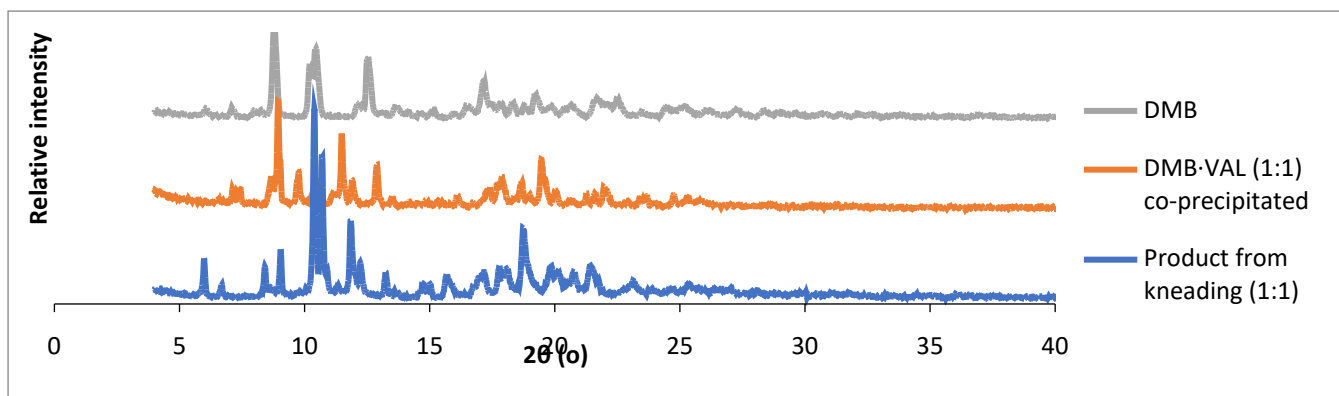

**Fig. S22** PXRD patterns of the crystal form of DMB employed in this study (polymorph 1, CSD refcode QIYKEO), DMB·VAL produced via co-precipitation (1:1), and a product from kneading DMB and valproic acid.

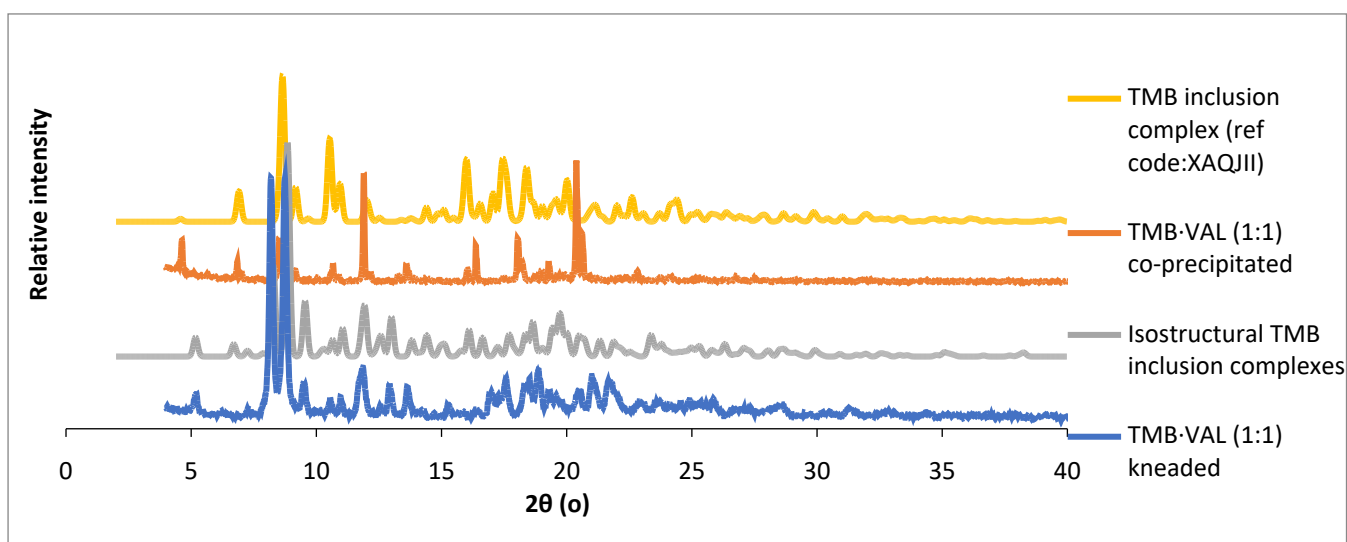

**Fig. S23** The PXRD patterns of a TMB complex crystallizing in the space group  $P2_12_12_1$  (refcode XAQJII), a TMB·VAL complex (1:1) produced *via* co-precipitation, a representative isostructural TMB inclusion complex that crystallizes in  $P2_12_12_1$  (refcode PAFSOE, with different unit cell data from XAQJII) and a different TMB·VAL complex produced *via* kneading.



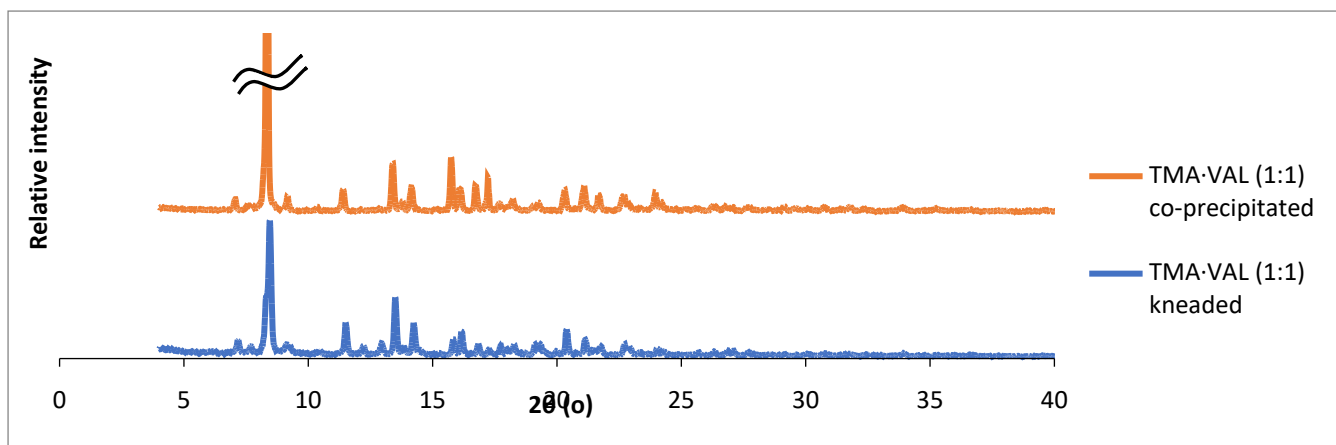

**Fig. S24** The PXRD patterns of the TMA·VAL inclusion complex produced *via* co-precipitation (1:1) and kneading (1:1).

**Table S8** Crystal Data and Refinement Parameters

|                                                         | BCD·VAL                                                                                                             | GCD·VAL                                                                                                            | DMB·VAL                                                                                                                                                             | TMA·VAL                                                                                                           |
|---------------------------------------------------------|---------------------------------------------------------------------------------------------------------------------|--------------------------------------------------------------------------------------------------------------------|---------------------------------------------------------------------------------------------------------------------------------------------------------------------|-------------------------------------------------------------------------------------------------------------------|
| Complex formula                                         | $2(\text{C}_{42}\text{H}_{70}\text{O}_{35}) \cdot 2(\text{C}_8\text{H}_{16}\text{O}_2) \cdot 9.2\text{H}_2\text{O}$ | $3(\text{C}_{48}\text{H}_{80}\text{O}_{40}) \cdot 4(\text{C}_8\text{H}_{16}\text{O}_2) \cdot 49\text{H}_2\text{O}$ | $(\text{C}_{56}\text{H}_{98}\text{O}_{35}) \cdot (\text{C}_{57}\text{H}_{100}\text{O}_{35}) \cdot 2(\text{C}_8\text{H}_{16}\text{O}_2) \cdot 3.9\text{H}_2\text{O}$ | $(\text{C}_{54}\text{H}_{96}\text{O}_{30}) \cdot (\text{C}_8\text{H}_{16}\text{O}_2) \cdot 1.2\text{H}_2\text{O}$ |
| Formula weight ( $\text{g} \cdot \text{mol}^{-1}$ )     | 2900.67                                                                                                             | 5350.95                                                                                                            | 3035.06                                                                                                                                                             | 1391.13                                                                                                           |
| Temperature (K)                                         | 100(2)                                                                                                              | 293(2)                                                                                                             | 173(2)                                                                                                                                                              | 100(2)                                                                                                            |
| Wavelength (Å)                                          | 0.71073                                                                                                             | 0.71073                                                                                                            | 0.71073                                                                                                                                                             | 0.71073                                                                                                           |
| Crystal system                                          | Monoclinic                                                                                                          | Tetragonal                                                                                                         | Triclinic                                                                                                                                                           | Orthorhombic                                                                                                      |
| Space group                                             | C2                                                                                                                  | P4 <sub>2</sub> 12                                                                                                 | P1                                                                                                                                                                  | P2 <sub>1</sub> 2 <sub>1</sub> 2 <sub>1</sub>                                                                     |
| a (Å)                                                   | 19.133(5)                                                                                                           | 23.745(4)                                                                                                          | 10.396(2)                                                                                                                                                           | 15.337(3)                                                                                                         |
| b (Å)                                                   | 24.566(7)                                                                                                           | 23.745(4)                                                                                                          | 15.111(3)                                                                                                                                                           | 20.728(4)                                                                                                         |
| c (Å)                                                   | 15.782(5)                                                                                                           | 23.100(5)                                                                                                          | 25.494(5)                                                                                                                                                           | 23.104(5)                                                                                                         |
| $\alpha$ (°)                                            | 90                                                                                                                  | 90                                                                                                                 | 83.247(4)                                                                                                                                                           | 90                                                                                                                |
| $\beta$ (°)                                             | 108.873(6)                                                                                                          | 90                                                                                                                 | 81.556(4)                                                                                                                                                           | 90                                                                                                                |
| $\gamma$ (°)                                            | 90                                                                                                                  | 90                                                                                                                 | 89.475(4)                                                                                                                                                           | 90                                                                                                                |
| Volume (Å <sup>3</sup> )                                | 7019(3)                                                                                                             | 13025(5)                                                                                                           | 3934(1)                                                                                                                                                             | 7345(3)                                                                                                           |
| Z                                                       | 2                                                                                                                   | 2                                                                                                                  | 1                                                                                                                                                                   | 4                                                                                                                 |
| Calculated density ( $\text{g} \cdot \text{cm}^{-3}$ )  | 1.372                                                                                                               | 1.364                                                                                                              | 1.281                                                                                                                                                               | 1.258                                                                                                             |
| $\mu$ ( $\text{mm}^{-1}$ )                              | 0.123                                                                                                               | 0.123                                                                                                              | 0.106                                                                                                                                                               | 0.101                                                                                                             |
| F (000)                                                 | 3108                                                                                                                | 5748                                                                                                               | 1635                                                                                                                                                                | 3008                                                                                                              |
| Crystal size (mm)                                       | 0.12 x 0.15 x 0.27                                                                                                  | 0.19 x 0.25 x 0.45                                                                                                 | 0.10 x 0.22 x 0.51                                                                                                                                                  | 0.16 x 0.19 x 0.43                                                                                                |
| $\theta$ -Range scanned (°)                             | 1.68 – 25.24                                                                                                        | 1.23 – 25.56                                                                                                       | 1.36 – 25.04                                                                                                                                                        | 2.71 – 20.29                                                                                                      |
| Index range                                             | h: -24, 24; k: -31, 31; l: -20, 20                                                                                  | h: -28, 28; k: -26, 28; l: -27, 27                                                                                 | h: -12, 12; k: -17, 17; l: -30, 30                                                                                                                                  | h: -19, 19; k: -26, 25; l: -29, 29                                                                                |
| No. of reflections collected                            | 29021                                                                                                               | 149732                                                                                                             | 44688                                                                                                                                                               | 67773                                                                                                             |
| No. of unique reflections                               | 15385                                                                                                               | 12162                                                                                                              | 26358                                                                                                                                                               | 16290                                                                                                             |
| Data completeness (%)                                   | 98.6                                                                                                                | 99.4                                                                                                               | 99.4                                                                                                                                                                | 99.2                                                                                                              |
| Data/restraints/parameters                              | 15385/16/802                                                                                                        | 12162/8/655                                                                                                        | 26358/35/1664                                                                                                                                                       | 16290/1/863                                                                                                       |
| S (Goodness-of-fit on $F^2$ )                           | 1.122                                                                                                               | 1.73                                                                                                               | 1.191                                                                                                                                                               | 1.017                                                                                                             |
| Final R indices $R_1, wR_2$ , [ $I > 2\sigma(I)$ ]      | 0.0997, 0.2742                                                                                                      | 0.1431, 0.4024                                                                                                     | 0.1055, 0.2904                                                                                                                                                      | 0.0676, 0.1482                                                                                                    |
| R Indices, all data ( $R_1, wR_2$ )                     | 0.1320, 0.3047                                                                                                      | 0.1554, 0.4101                                                                                                     | 0.1494, 0.3294                                                                                                                                                      | 0.1342, 0.1761                                                                                                    |
| Largest diff. peak and hole ( $e \cdot \text{Å}^{-3}$ ) | 1.27, -0.42                                                                                                         | 0.55, -0.63                                                                                                        | 0.83, -0.47                                                                                                                                                         | 0.38, -0.34                                                                                                       |

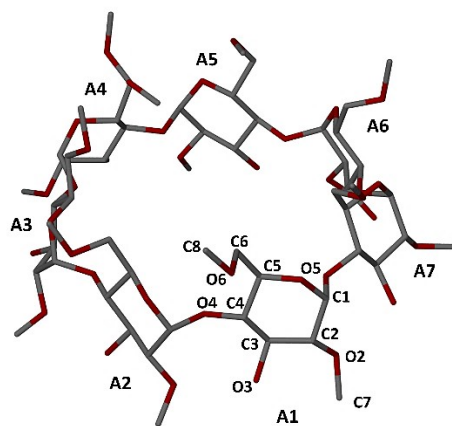

**Fig. S25** Key to atomic and glucose residue numbering for DMB(A).

**Table S9** Geometrical parameters for the host molecule A in DMB·VAL.

| Residue | $l$ (Å) | $D$ (Å) | $\Phi$ (°) | $d$ (°) | $\alpha^a$ (Å) | $D_3^b$ (Å) | $\tau_2^c$ (°) |
|---------|---------|---------|------------|---------|----------------|-------------|----------------|
| A1      | 4.992   | 4.449   | 129.6      | 8.3     | -0.086         | 2.97        | 11.4           |
| A2      | 4.990   | 4.393   | 130.5      | -3.3    | -0.094         | 2.82        | 7.0            |
| A3      | 5.208   | 4.342   | 124.7      | -10.0   | 0.179          | 2.84        | 19.2           |
| A4      | 5.037   | 4.422   | 129.7      | 15.8    | 0.015          | 2.96        | 22.7           |
| A5      | 4.952   | 4.455   | 129.8      | -8.0    | -0.241         | 2.80        | 4.2            |
| A6      | 5.111   | 4.311   | 127.2      | 0.1     | 0.189          | 2.80        | 6.8            |
| A7      | 5.151   | 4.417   | 127.0      | -2.8    | 0.038          | 2.83        | 22.7           |

<sup>a</sup> mean e.s.d. 0.005 Å; <sup>b</sup> mean e.s.d. 0.01 Å; <sup>c</sup> mean e.s.d. 0.5°

$l$ , the distance of each O4 atom from the centroid of the O4-polygon;  
 $D$ , the glycosidic O4...O4' distance;  
 $\Phi$  the O4...O4'...O4'' angle;  
 $d$ , the O4...O4'...O4''...O4''' torsion angle;  
 $\alpha$ , the deviation of each O4 atom from the mean O4-plane;  
 $D_3$ , the O2...O3' intra-ring distance;  
 $\tau_2$  tilt angle: the angle between the plane containing O4, C4, C1 and O4' of a given glucose ring and the mean O4-plane.

**Fig. S26** Key to atomic and glucose residue numbering for DMB(B).

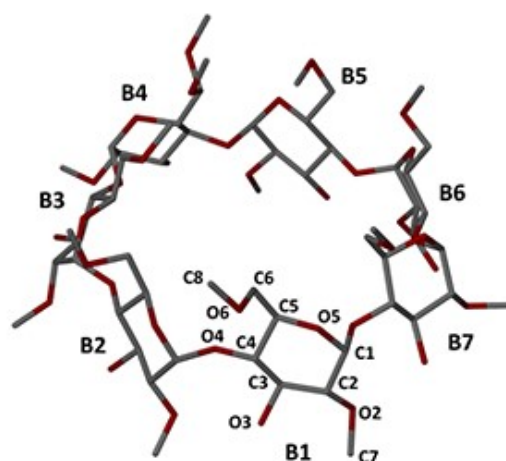

**Table S10** Geometrical parameters for the host molecule B in DMB·VAL

| Residue | $l$ (Å) | $D$ (Å) | $\Phi$ (°) | $d$ (°) | $\alpha^a$ (Å) | $D_3^b$ (Å) | $\tau_2^c$ (°) |
|---------|---------|---------|------------|---------|----------------|-------------|----------------|
| B1      | 5.000   | 4.426   | 129.1      | 12.6    | -0.189         | 2.89        | 11.8           |
| B2      | 5.075   | 4.433   | 128.8      | -10.6   | -0.097         | 2.85        | 6.4            |
| B3      | 5.195   | 4.300   | 124.1      | -8.0    | 0.311          | 3.27        | 27.5           |
| B4      | 4.925   | 4.476   | 132.2      | 19.0    | -0.074         | 2.98        | 23.8           |
| B5      | 5.003   | 4.358   | 128.1      | -9.3    | -0.307         | 2.88        | 3.6            |
| B6      | 5.156   | 4.342   | 125.9      | -3.6    | 0.279          | 2.83        | 8.5            |
| B7      | 5.061   | 4.469   | 128.9      | -0.5    | 0.077          | 2.84        | 25.4           |

<sup>a</sup> mean e.s.d. 0.006 Å; <sup>b</sup> mean e.s.d. 0.01 Å; <sup>c</sup> mean e.s.d. 0.5°

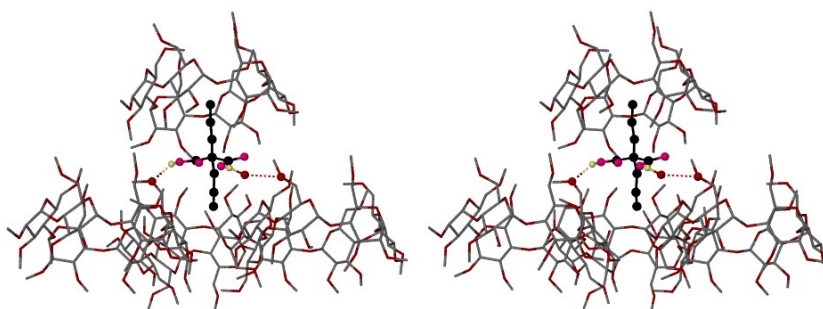

**Fig. S27** Stereoview of the inclusion mode of the guest molecule VAL in TMA, showing the location of the protruding guest residue in an interstice at the junction of three neighbouring TMA molecules in the layer below. For clarity, the VAL molecules included in the three CD molecules have been omitted (as have H atoms, except those of the VAL -COOH group). Both disordered components of the -COOH group engage in H-bonding with neighbouring CD molecules.

**Table S11** Geometrical parameters of the host molecule in TMA·VAL.

| Residue | $l$ (Å) | $D$ (Å) | $\Phi$ (°) | $d$ (°) | $\alpha^a$ (Å) | $D_3^b$ (Å) | $\tau_2^c$ (°) |
|---------|---------|---------|------------|---------|----------------|-------------|----------------|
| A       | 4.381   | 4.377   | 115.6      | -6.5    | 0.283          | 3.314       | 9.2            |
| B       | 4.124   | 4.240   | 123.0      | -9.7    | -0.246         | 3.428       | 17.5           |
| C       | 4.274   | 4.212   | 120.2      | 17.4    | -0.040         | 3.279       | 33.5           |
| D       | 4.385   | 4.336   | 114.8      | -7.9    | 0.294          | 3.279       | 7.2            |
| E       | 4.084   | 4.241   | 124.4      | -8.6    | -0.260         | 3.440       | 17.2           |
| F       | 4.302   | 4.225   | 118.9      | 16.0    | -0.030         | 3.156       | 30.0           |

<sup>a</sup> mean esd: 0.002 Å; <sup>b</sup> mean esd: 0.1°; <sup>c</sup> mean e.s.d. 0.12°

### Calculations: Gravimetric solubility analysis

#### $\alpha$ -CD·VAL:

Experiment 1: Mass of penultimate and final increment of inclusion complex: 5.22 – 5.59 mg

Experiment 2: Mass of penultimate and final increment of inclusion complex: 5.22 – 5.49 mg

Fraction of valproic acid in  $\alpha$ -CD·VAL:

$$\frac{144.211 \text{ g/mol}}{144.211 \text{ g/mol} + 2(972.846 \text{ g/mol}) + 13.5(18.016) \text{ g/mol}} = 0.061810$$

Therefore, the mass range of valproic acid solubilized in 1 ml H<sub>2</sub>O is:

Experiment 1: 0.061810 x (5.22 – 5.59 mg) = **0.323 – 0.346 mg**

Experiment 2: 0.061810 x (5.22 – 5.49 mg) = **0.323 – 0.339 mg**

#### $\beta$ -CD·VAL:

Experiment 1: Mass of penultimate and final increment of inclusion complex: 5.14 – 5.43 mg

Experiment 2: Mass of penultimate and final increment of inclusion complex: 4.97 – 5.18 mg

Fraction of valproic acid in  $\beta$ -CD·VAL:

$$\frac{144.211 \text{ g/mol}}{144.211 \text{ g/mol} + 1134.987 \text{ g/mol} + 9.2(18.016) \text{ g/mol}} = 0.099804$$

Therefore, the mass range of valproic acid solubilized in 1 ml H<sub>2</sub>O is:

Experiment 1: 0.099804 x (5.14 – 5.43 mg) = **0.513 – 0.542 mg**

Experiment 2: 0.099804 x (4.97 – 5.18 mg) = **0.496 – 0.517 mg**

#### $\gamma$ -CD·VAL:

Experiment 1: Mass of penultimate and final increment of inclusion complex: 6.92 – 7.15 mg

Experiment 2: Mass of penultimate and final increment of inclusion complex: 6.77 – 7.04 mg

Fraction of valproic acid in  $\gamma$ -CD·VAL:

$$\frac{144.211 \text{ g/mol}}{144.211 \text{ g/mol} + \frac{3}{4}(1297.128) \text{ g/mol} + 12.2(18.016) \text{ g/mol}} = 0.10787$$

Therefore, the mass range of valproic acid solubilized in 1 ml H<sub>2</sub>O is:

Experiment 1: 0.10787 x (6.92 – 7.15 mg) = **0.746 – 0.771 mg**

Experiment 2: 0.10787 x (6.77 – 7.04 mg) = **0.730 – 0.759 mg**
